# Supplementary material for: Simultaneous Comparison of Subxiphoid and Intercostal Wound Pain in the Same Patients Following Thoracoscopic Surgery
Source: MDPI journal article supplement (doi:10.3390/jcm11082254), 2022-04-18
Supplement: s1 [file s1]

Supplemental Table S1: Postoperative numerical rating scale (NRS) pain score for overall patients

| Pain score    | All VATS ( <i>n</i> = 44) |             |                   |             |                 |
|---------------|---------------------------|-------------|-------------------|-------------|-----------------|
|               | Subxiphoid wound          | 95% CI      | Intercostal wound | 95% CI      | <i>P</i> -value |
| POD-1         | 2.6 ± 2.0                 | (2.0 – 3.3) | 2.1 ± 1.5         | (1.6 – 2.6) | 0.06            |
| POD-2         | 1.8 ± 1.7                 | (1.3 – 2.3) | 1.3 ± 1.3         | (0.9 – 1.7) | 0.01            |
| POD-Discharge | 1.0 ± 1.1                 | (0.6 – 1.3) | 0.9 ± 0.9         | (0.6 – 1.2) | 0.62            |
| POD-30        | 0.3 ± 0.8                 | (0.1 – 0.6) | 0.5 ± 1.1         | (0.2 – 0.8) | 0.23            |
| POD-90        | 0.1 ± 0.3                 | (0.0 – 0.1) | 0.5 ± 1.0         | (0.2 – 0.8) | 0.008           |
| POD-180       | 0 ± 0                     | (0.0 – 0.0) | 0.1 ± 0.3         | (0.0 – 0.2) | 0.02            |

NRS: numerical rating scale; VATS: video-assisted thoracoscopic surgery; CI: confidence interval; POD: postoperative day; data were expressed as mean ± standard deviation
