# Supplementary material for: Simultaneous Comparison of Subxiphoid and Intercostal Wound Pain in the Same Patients Following Thoracoscopic Surgery
Source: MDPI journal article supplement (doi:10.3390/jcm11082254), 2022-04-18
Supplement: s1 [file s1]

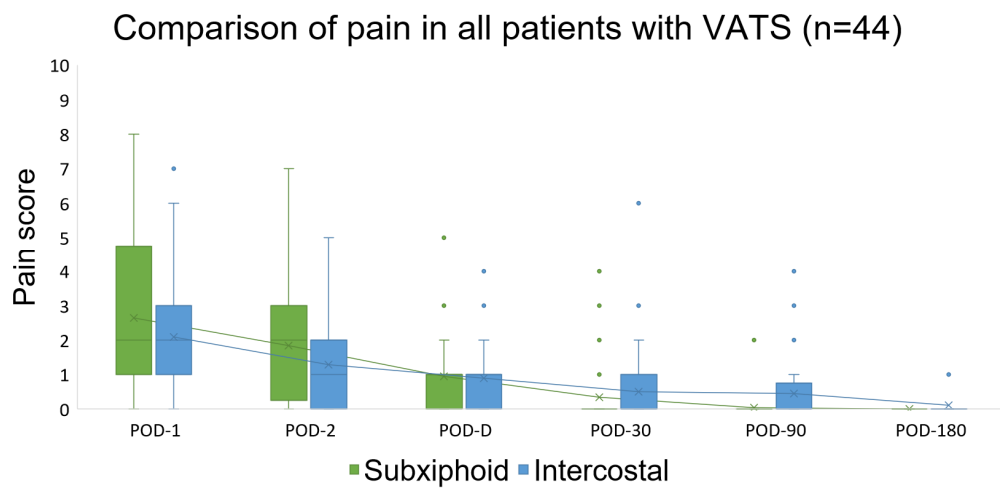

**Figure S1:** A box and whisker plot demonstrating pain score between subxiphoid and intercostal incisions for the same patient who received bilateral uniportal and unilateral multiportal.
